# Supplementary material
Source: ML conference proceedings conference paper supplement (https://openreview.net/forum?id=7C3keUoryI)
Supplement: supplementary_material [file attachment]

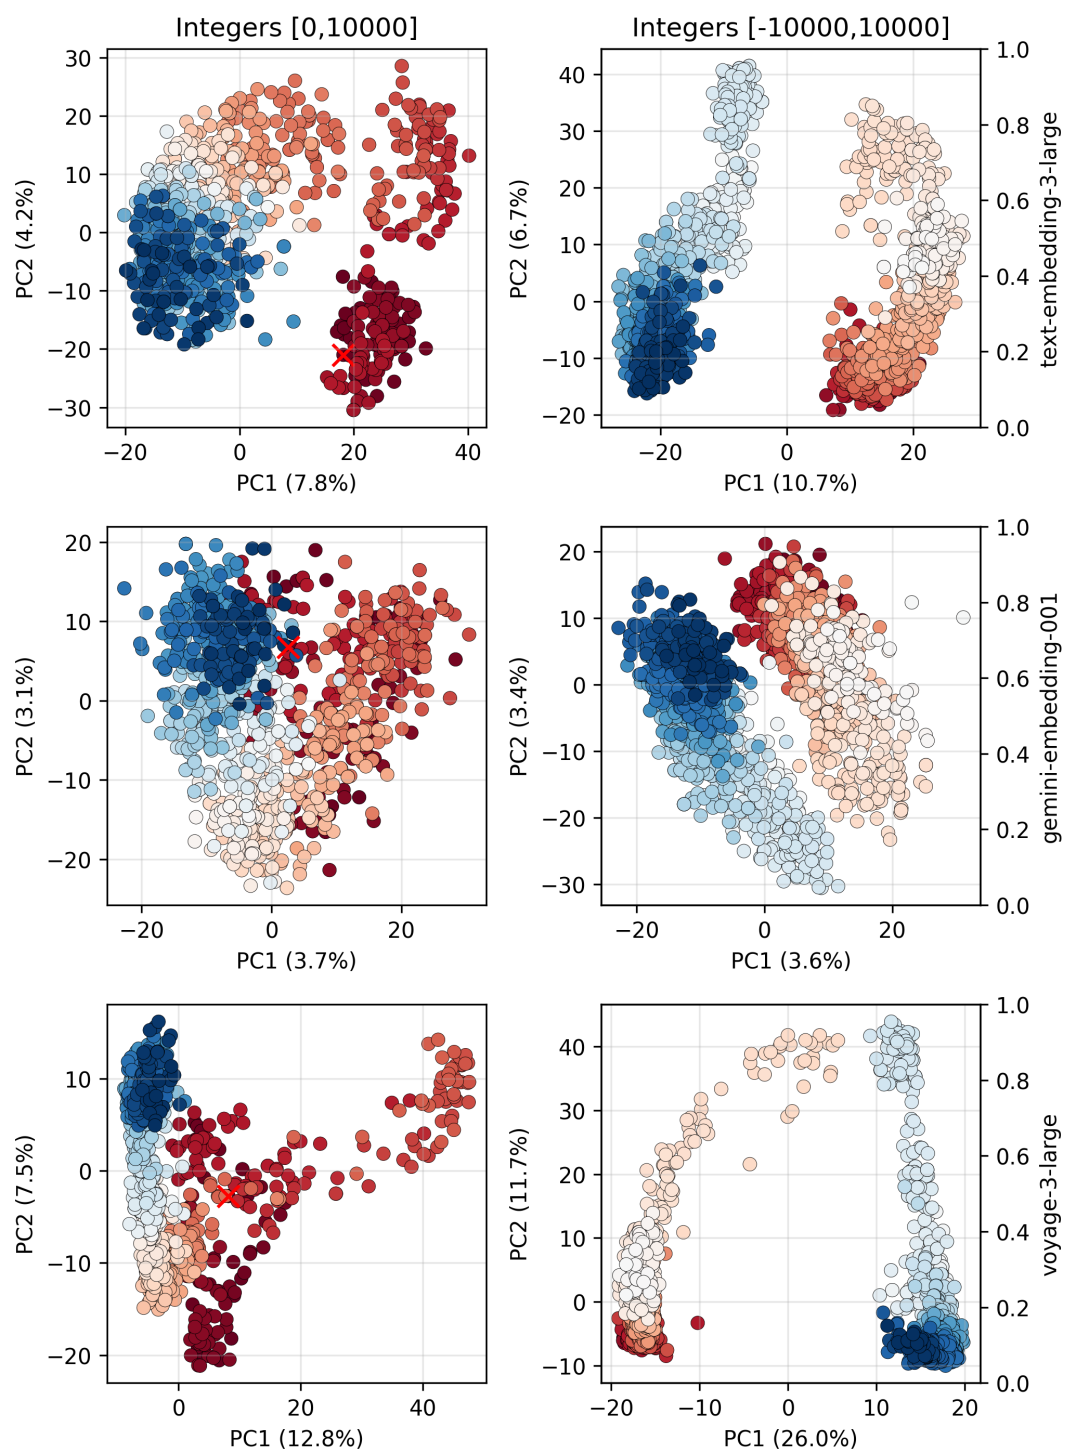

Figure 7: PCA over randomly sampled  $x \in [0, 10k]$ ,  $|X| = 1000$  (left) and  $x \in [-10k, 10k]$ ,  $|X| = 2000$  (right) for the main OpenAI, Voyage and Gemini models.

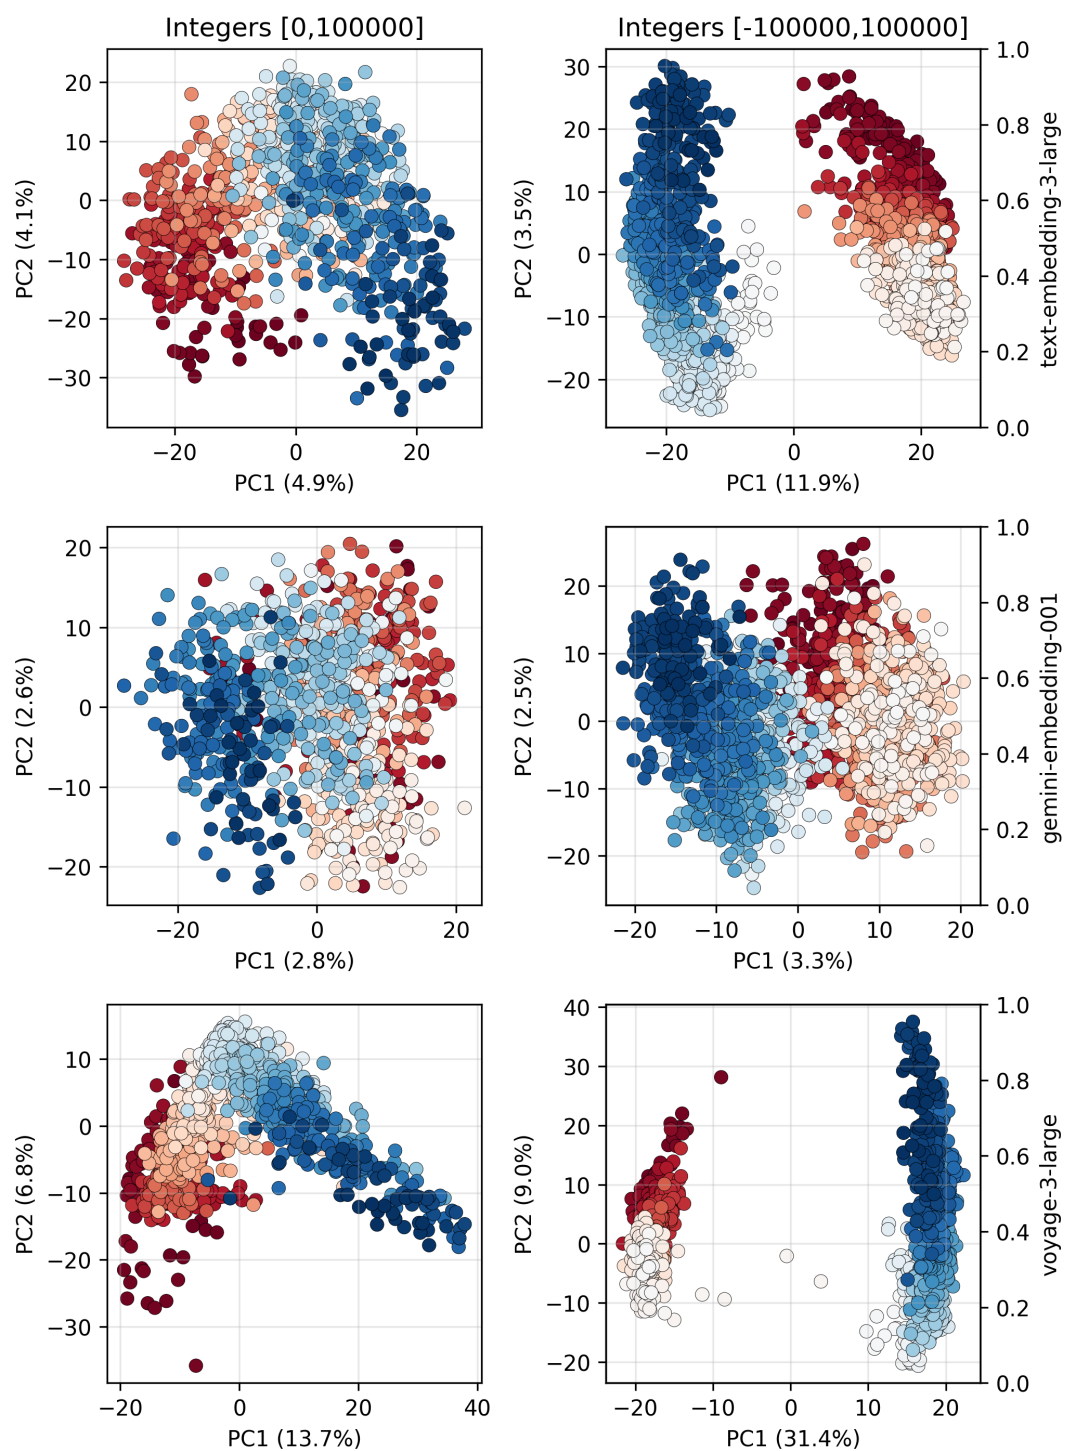

Figure 8: PCA over randomly sampled  $x \in [0, 100k]$ ,  $|X| = 1000$  (left) and  $x \in [-100k, 100k]$ ,  $|X| = 2000$  (right) for the main OpenAI, Voyage and Gemini models.

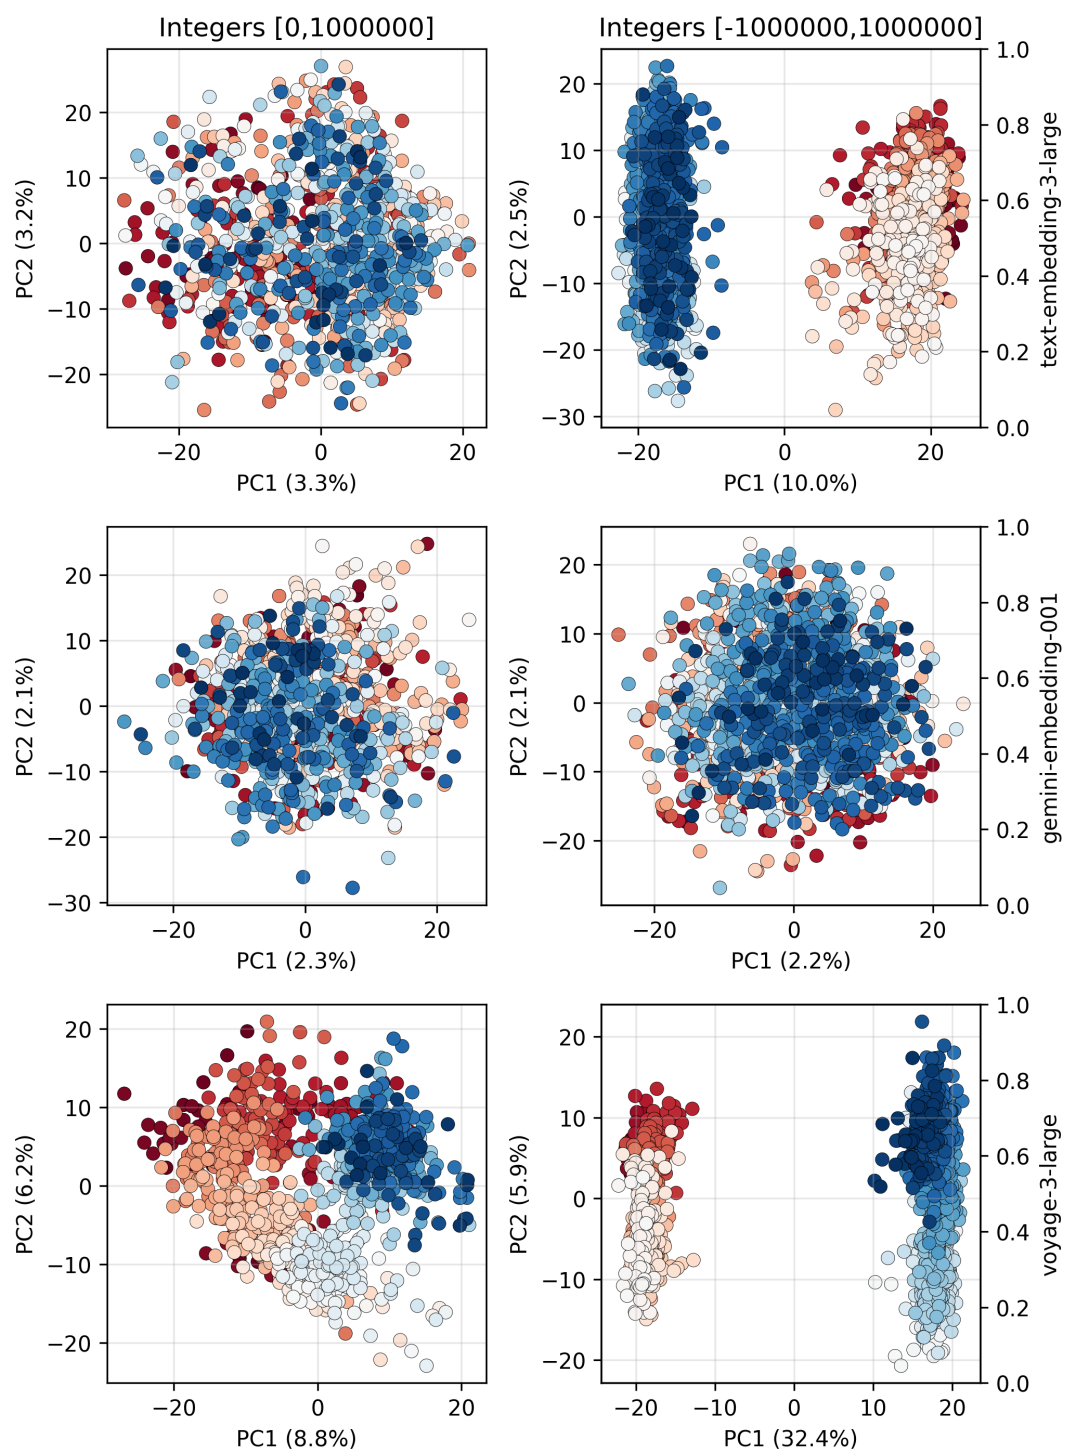

Figure 9: PCA over randomly sampled  $x \in [0, 1M]$ ,  $|X| = 1000$  (left) and  $x \in [-1M, 1M]$ ,  $|X| = 2000$  (right) for the main OpenAI, Voyage and Gemini models.

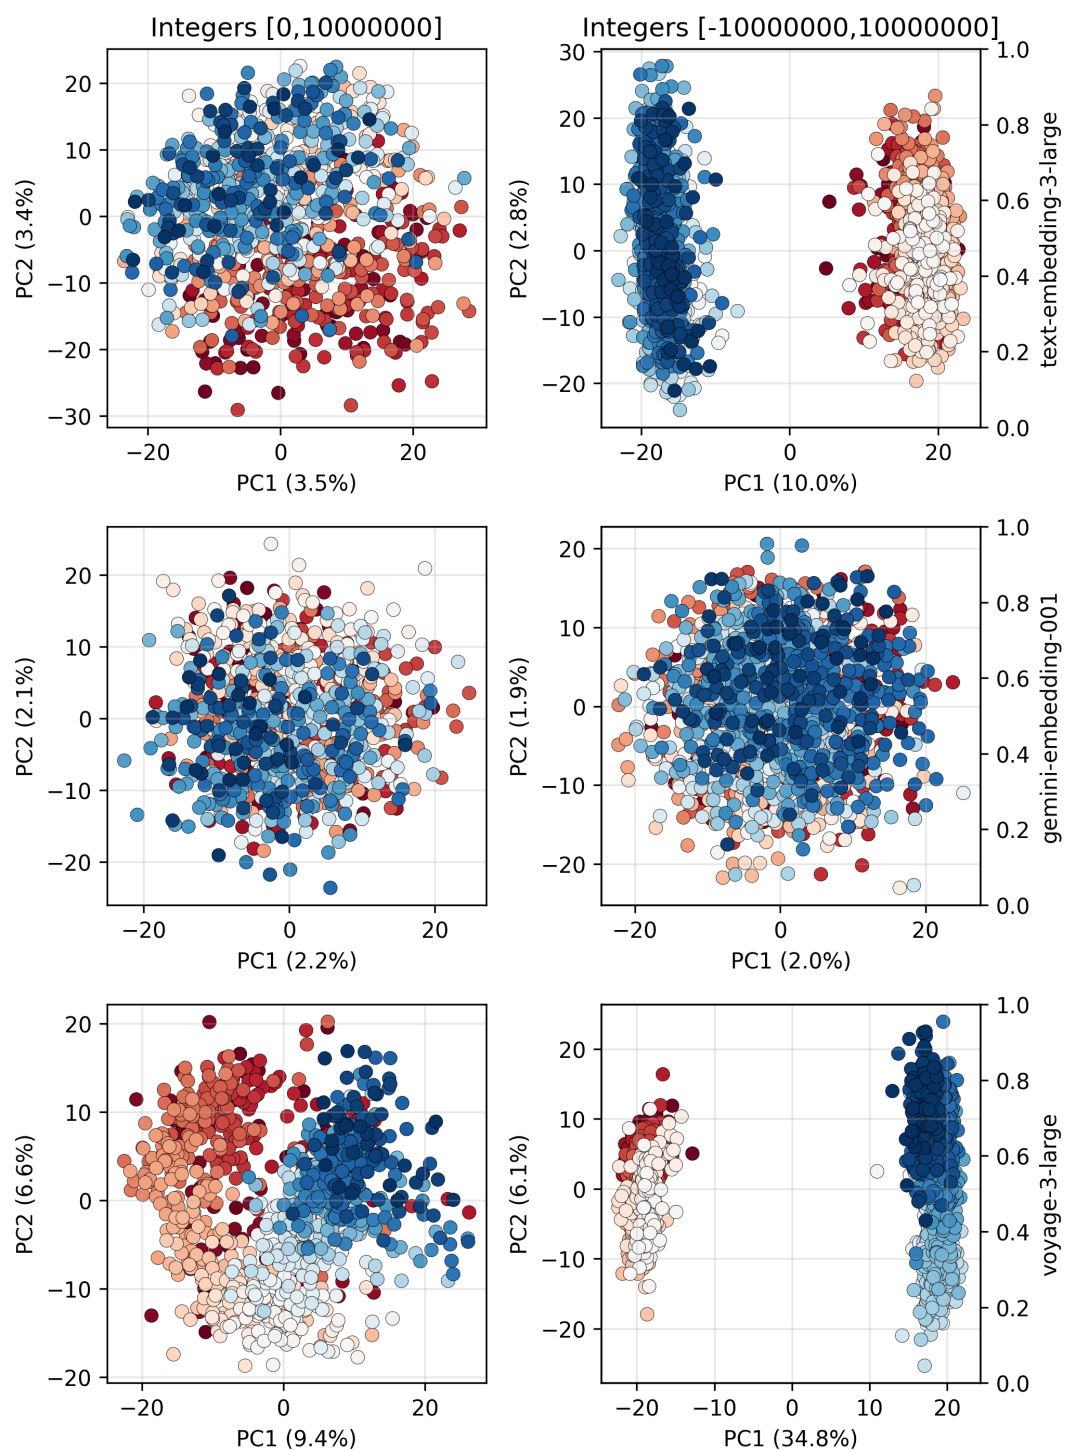

Figure 10: PCA over randomly sampled  $x \in [0, 10M]$ ,  $|X| = 1000$  (left) and  $x \in [-10M, 10M]$ ,  $|X| = 2000$  (right) for the main OpenAI, Voyage and Gemini models.
